# Supplementary material for: Nickel foam supported mesoporous NiCo2O4 arrays with excellent methanol electro-oxidation performance
Source: Royal Society of Chemistry journal article supplement (doi:10.1039/c5nj00766f), 2015-01-01
Supplement: c5nj00766f1.pdf [file c5nj00766f1.pdf]

## Supporting Information

### **Nickel foam supported mesoporous NiCo<sub>2</sub>O<sub>4</sub> arrays with excellent methanol electro-oxidation performance**

Wei Wang,<sup>a</sup> Qingxin Chu,<sup>b</sup> Yingnan Zhang,<sup>a</sup> Wei Zhu,<sup>a</sup> Xiaofeng Wang<sup>a</sup> and

Xiaoyang Liu<sup>\*a</sup>

<sup>a</sup>State key Laboratory of Inorganic Synthesis and Preparative Chemistry, College of Chemistry, Jilin University, Changchun 130012, China. Tel/Fax: +86-0431-85168316.

E-mail:liuxy@jlu.edu.cn

<sup>b</sup>Center for High Pressure Science and Technology Advanced Research, Changchun 130012, China.

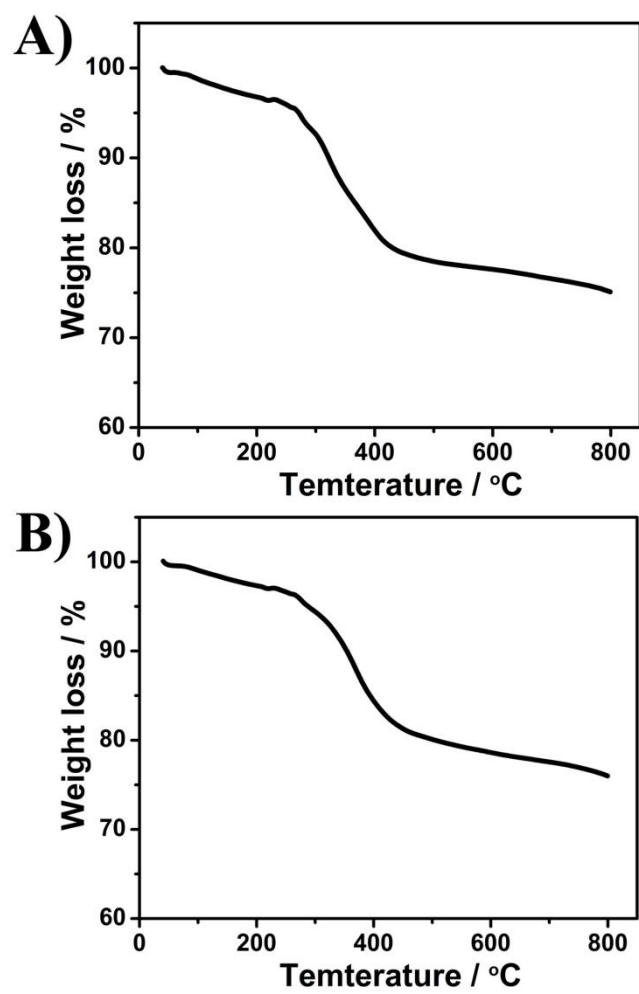

**Fig. S1** TGA plots for the precursors of (A) NCO-NS and (B) NCO-NC

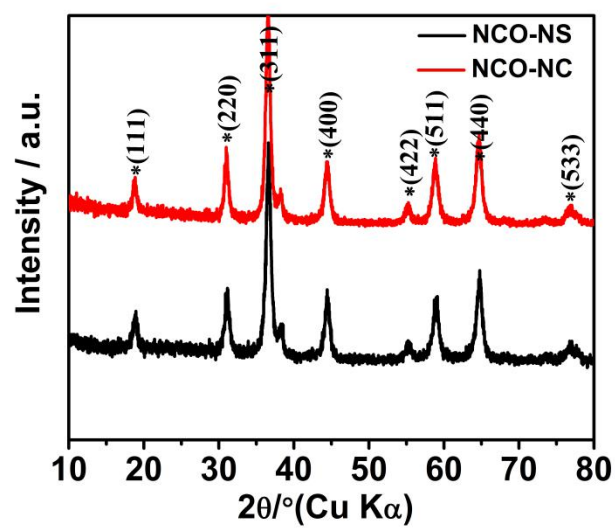

**Fig. S2** XRD patterns of NCO-NS (black line) and NCO-NC (red line) scratched down from nickel foam

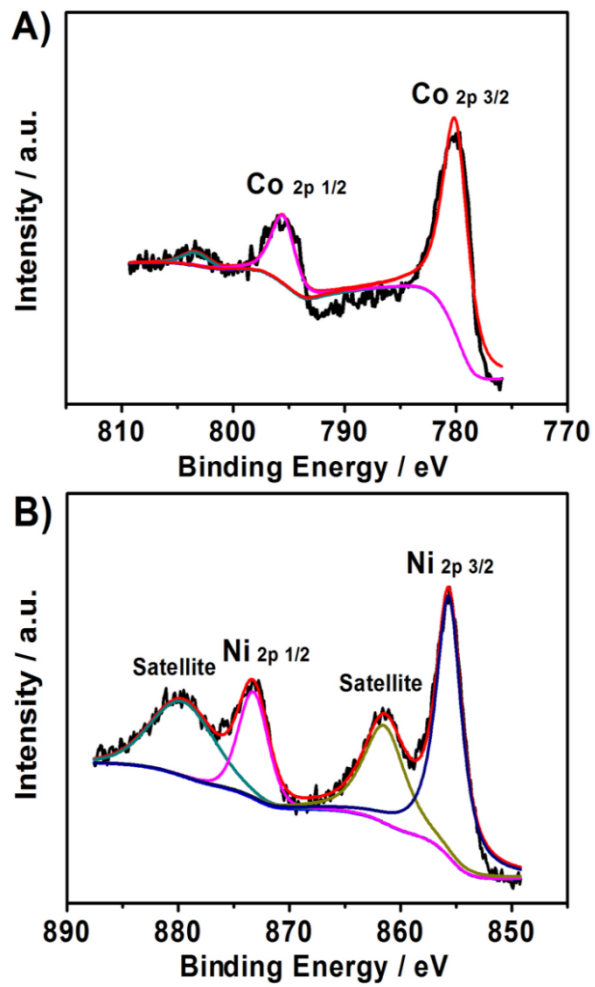

**Fig. S3** High-resolution XPS spectra of (A) Co 2p and (B) Ni 2p of NCO-NS

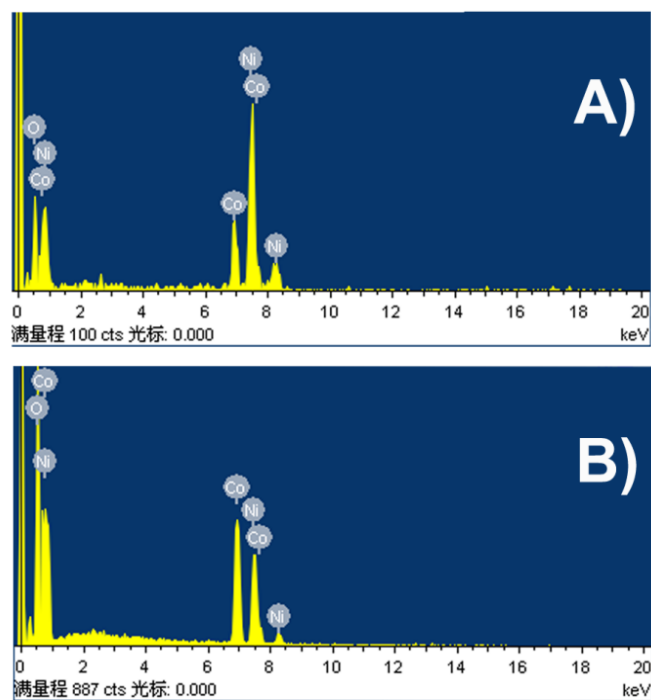

**Fig. S4** EDS analysis of (A) NCO-NS and (B) NCO-NC

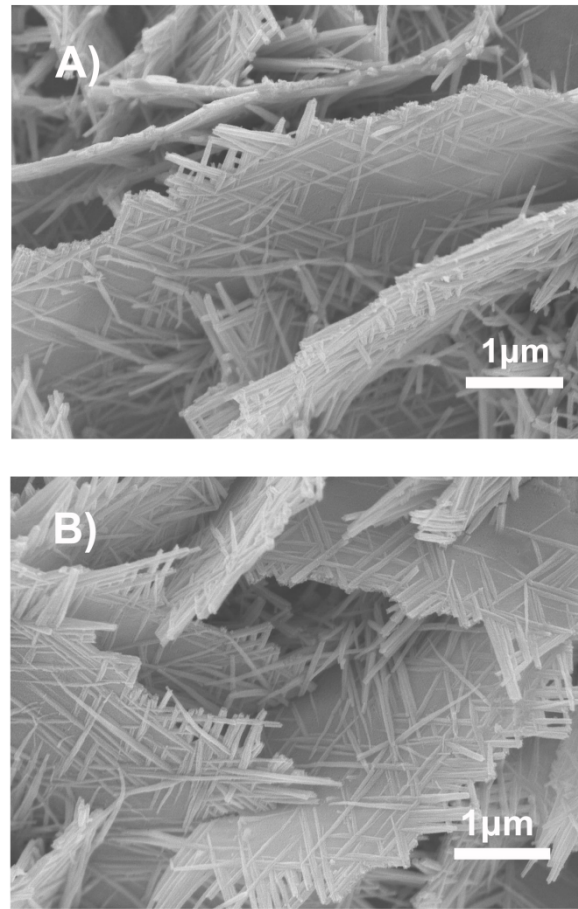

**Fig. S5** The high-magnification images of NCO-NC grown on nickel foam.

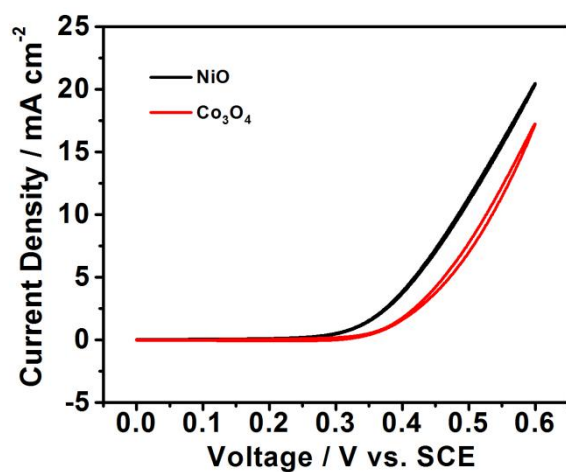

**Fig. S6** CV plots of Co<sub>3</sub>O<sub>4</sub> and NiO electrodes in 1 M KOH with 0.5 M methanol at a scan rate of 10 mV s<sup>-1</sup>

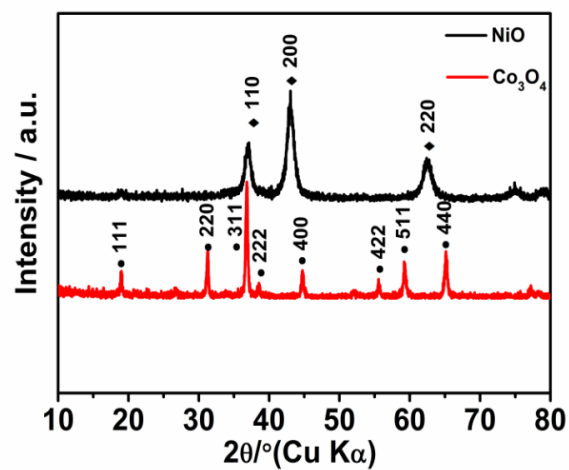

**Fig. S7** XRD patterns of NiO (black line) and Co<sub>3</sub>O<sub>4</sub> (red line) scratched down from nickel foam



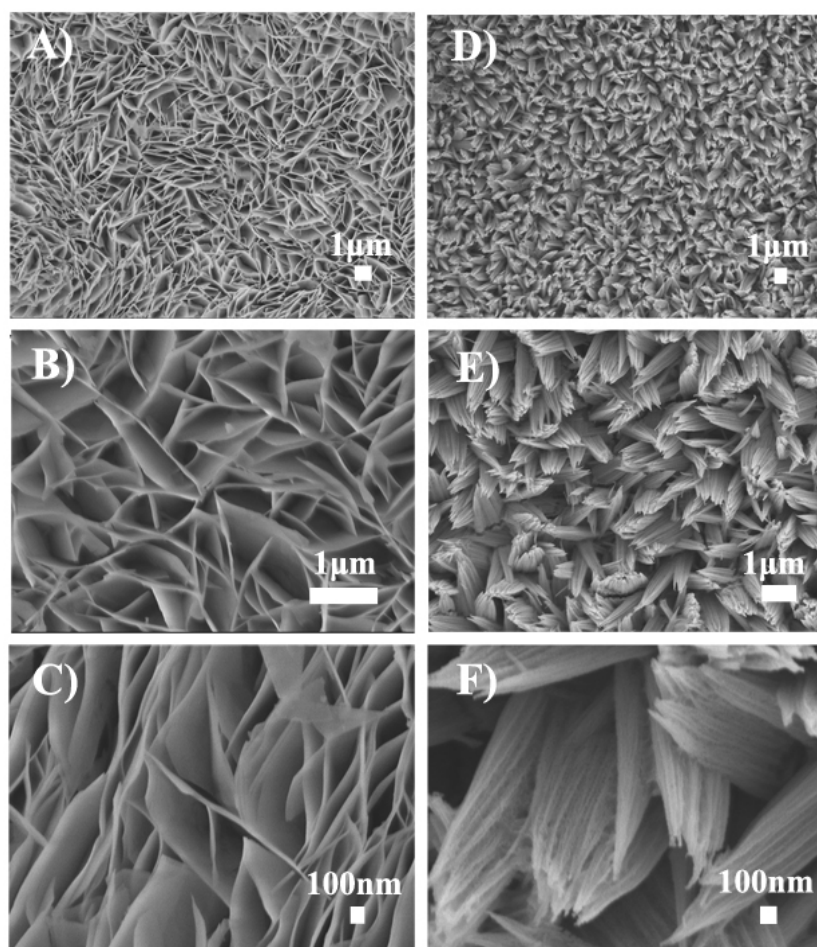

**Fig. S8** SEM images of (A-C) NiO and (D-E) Co<sub>3</sub>O<sub>4</sub> grown on nickel foam

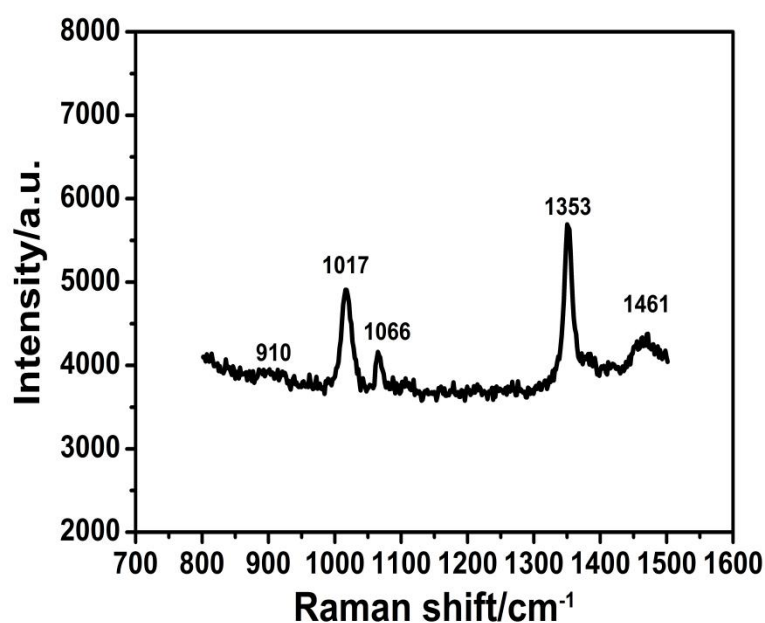

**Fig. S9** Raman spectra of 1 M KOH electrolytes with 0.5 M methanol after 500 cycles. The peaks around  $1017\text{ cm}^{-1}$  and  $1461\text{ cm}^{-1}$  are C-O stretching mode and  $\text{CH}_3$  bending mode of  $\text{CH}_3\text{OH}$  (J. Phys. Chem., 1980, 84, 3130). In addition, it can be clearly see that the additional peaks around 910, 1066, 1353 and  $1461\text{ cm}^{-1}$ ( overlapping peaks), which maybe belong to the symmetric C-O stretching mode, antisymmetric C-O stretching mode, C-H wagging motion and C=O in plane of HCOH (J. Phys. Chem. B, 2005, 109, 432). The involvement of OH and CHO species as intermediates in the electro-oxidation of methanol has been proposed in elsewhere (Electrochim. Acta, 1998, 44, 1135. Journal of Power Sources, 2008, 185, 776). Therefore, Raman spectra of electrolytes can prove that  $\text{CH}_3\text{OH}$  has been oxidized to other intermediate products.

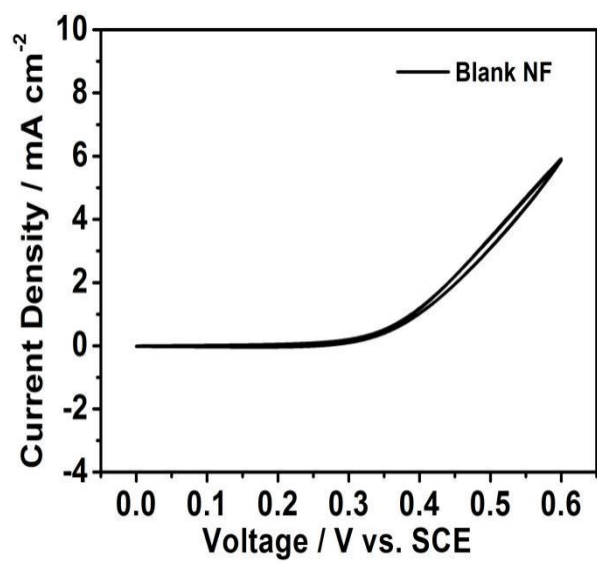

**Fig. S10** CV plot of blank nickel foam in 1 M KOH with 0.5 M methanol at a scan rate of 10 mV s<sup>-1</sup>

**Table 1**

The fitting values of impedimetric parameters for both NiCo<sub>2</sub>O<sub>4</sub> electrodes in 1 M KOH electrolytes with and without 0.5 M methanol.

| Electrode | Impedimetric parameters |                      |                                                    |                      |                                                      |                                                    |     |      |                   |                       |
|-----------|-------------------------|----------------------|----------------------------------------------------|----------------------|------------------------------------------------------|----------------------------------------------------|-----|------|-------------------|-----------------------|
|           | L                       | R <sub>e</sub>       | Q <sub>1</sub> , Y <sub>0</sub>                    | R <sub>ct</sub>      | W, Y <sub>0</sub>                                    | Q <sub>2</sub> , Y <sub>0</sub>                    | n1  | n2   | f <sub>knee</sub> | C                     |
|           | (Ω cm <sup>2</sup> )    | (Ω cm <sup>2</sup> ) | (Ω <sup>-1</sup> S <sup>n</sup> cm <sup>-2</sup> ) | (Ω cm <sup>2</sup> ) | (Ω <sup>-1</sup> S <sup>0.5</sup> cm <sup>-2</sup> ) | (Ω <sup>-1</sup> S <sup>n</sup> cm <sup>-2</sup> ) |     |      | (Hz)              | (F cm <sup>-2</sup> ) |
| WO-NCO-NS | 7.4E <sup>-7</sup>      | 1.59                 | 2.6E <sup>-3</sup>                                 | 4.27                 | 0.67                                                 | 0.18                                               | 0.6 | 0.96 | 6.8               | -                     |
| WO-NCO-NC | 9.5E <sup>-7</sup>      | 0.87                 | 3.7E <sup>-3</sup>                                 | 0.89                 | 0.55                                                 | -                                                  | 0.7 | -    | 31.6              | 0.3                   |
| W-NCO-NS  | 6.4E <sup>-7</sup>      | 1.75                 | 7.5E <sup>-3</sup>                                 | 5.02                 | 0.24                                                 | 0.34                                               | 0.6 | 0.98 | 2.2               | -                     |
| W-NCO-NC  | 7.4E <sup>-7</sup>      | 1.33                 | 7.1E <sup>-3</sup>                                 | 0.86                 | 0.97                                                 | -                                                  | 0.6 | -    | 26.1              | 0.3                   |

Note: The symbols “W” and “WO” represent the 1 M KOH electrolytes with and without 0.5 M methanol respectively.
